# Supplementary material
Source: publisher site journal article supplement (https://www.spandidos-publications.com/2391/downloadSupplementary)
Supplement: Supplementary file 1 [file downloadSupplementary]

## Sheet: Sheet1
Table SI: Reverse transcription quantitative PCR primer sets.
HLA-DRA	Forward primer	TTGGCCAACATAGCTGTGGA
	Reverse primer	ACTGGTGGGGTGAACTTGTC
IL-12	Forward primer	CTCCAGAAGGCCAGACAAACTC
	Reverse primer	GCCAGGCAACTCCCATTAGTTA
CD80	Forward primer	CGCCTCTCTGAAGATTACCCA
	Reverse primer	TGTTCCTGGGTCTCCAAAGG
iNOS	Forward primer	CGCATGACCTTGGTGTTTGG
	Reverse primer	CATAGACCTTGGGCTTGCCA
MCP-1	Forward primer	GATCTCAGTGCAGAGGCTCG
	Reverse primer	TTTGCTTGTCCAGGTGGTCC
CXCR4	Forward primer	GTGACTTTGAAACCCTCAGCG
	Reverse primer	TGGGCTAAGGGCACAAGAGA
IL-10	Forward primer	CTGCTCTGTTGCCTGGTCCTC
	Reverse primer	CTCTGCTGAAGGCATCTCGGA
ARG1	Forward primer	ACTTAAAGAACAAGAGTGTGATGTG
	Reverse primer	TGACTCCAAGATCAGGGTGG
GREM1	Forward primer	TGGGAGCCCTGCATGTGA
	Reverse primer	CCTTCCTCGTGGATGGTCTG
Smad2	Forward primer	GGAGAAGCAGCTCGCCA
	Reverse primer	GCGTGAATGGCAAGATGGAC
Smad3	Forward primer	GCGCACTGACCATAAGAGC
	Reverse primer	CATCCAGGGACTCAAACGTGG
β-Actin	Forward primer	GCTCGTCGTCGACAACGGCTC
	Reverse primer	CAAACATGATCTGGGTCATCTTCTC
miR-4793-3p	Forward primer	GCGTCTGCACTGTGAGTTGG
	Reverse primer	AGTGCAGGGTCCGAGGTATT
